# Supplementary material for: Synthesis and structures of a pincer-type rhodium(iii) complex: reactivity toward biomolecules
Source: Royal Society of Chemistry journal article supplement (doi:10.1039/c6dt02772e), 2016-01-01
Supplement: c6dt02772e1.pdf [file c6dt02772e1.pdf]

## Supplementary Material

### Synthesis and Structures of Pincer-Type Rhodium(III) complex; Reactivity Toward Biomolecules

**Milan M. Milutinović,<sup>a</sup> Jovana V. Bogojeski,<sup>a\*</sup> Olivera Klisurić,<sup>b</sup>  
Andreas Scheurer,<sup>c</sup> Sofi K.C. Elmroth,<sup>d</sup> Živadin D. Bugarčić<sup>a\*</sup>**

<sup>a</sup>*University of Kragujevac, Faculty of Science, Radoje Domanovića 12, 34000 Kragujevac, Serbia*

<sup>b</sup>*University of Novi Sad, Faculty of Science, Department of Physics, Trg Dositeja Obradovića 3, 21000 Novi Sad, Serbia*

<sup>c</sup>*University of Erlangen-Nürnberg, Department Chemie und Pharmazie, Lehrstuhl für Anorganische und Allgemeine Chemie, Egerlandstr. 1, 91058 Erlangen, Germany*

<sup>d</sup>*Lund University, Biochemistry and Structural Biology, KILU, POBox 124, SE-221 00 Lund, Sweden*

**\* Corresponding authors:** Prof. Dr. Živadin D. Bugarčić  
Faculty of Science, University of Kragujevac  
Radoje Domanovića 12, 34000 Kragujevac, Serbia  
Tel: +381(0)34300262  
Fax: +381(0)34335040  
e-mail: [bugarcic@kg.ac.rs](mailto:bugarcic@kg.ac.rs)

Dr. Jovana Bogojeski  
Faculty of Science, University of Kragujevac  
Radoje Domanovića 12, 34000 Kragujevac, Serbia  
Tel: +381(0)34300262  
Fax: +381(0)34335040  
e-mail: [jrosic@kg.ac.rs](mailto:jrosic@kg.ac.rs)

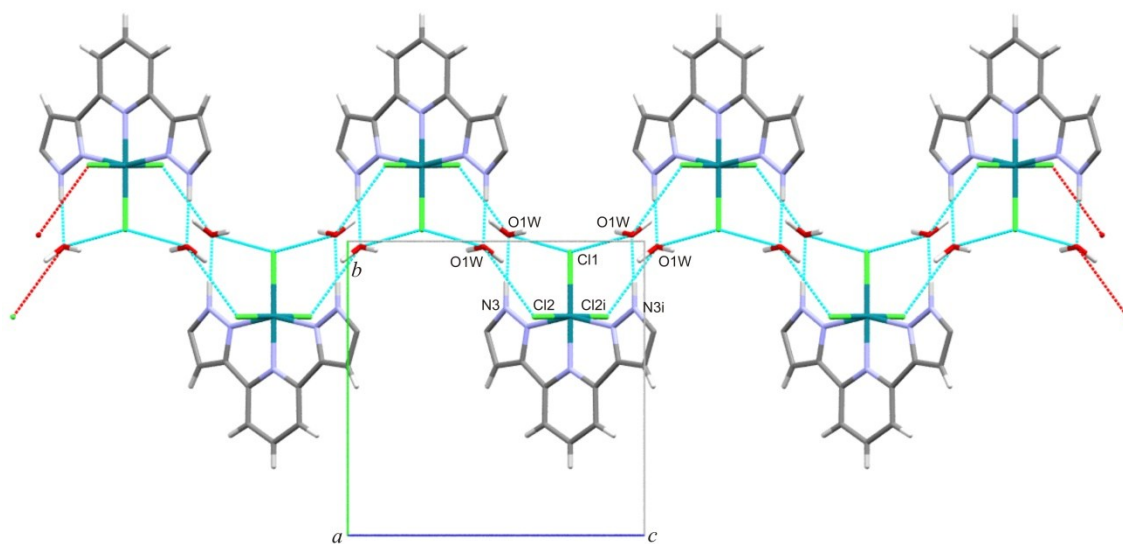

**Figure S1.** MERCURY<sup>11</sup> drawing showing the crystal packing of [Rh(LH<sub>2</sub><sup>t</sup>Bu)Cl<sub>3</sub>] complex along the *a* axis. Hydrogen bonds are shown as light blue dashed lines.

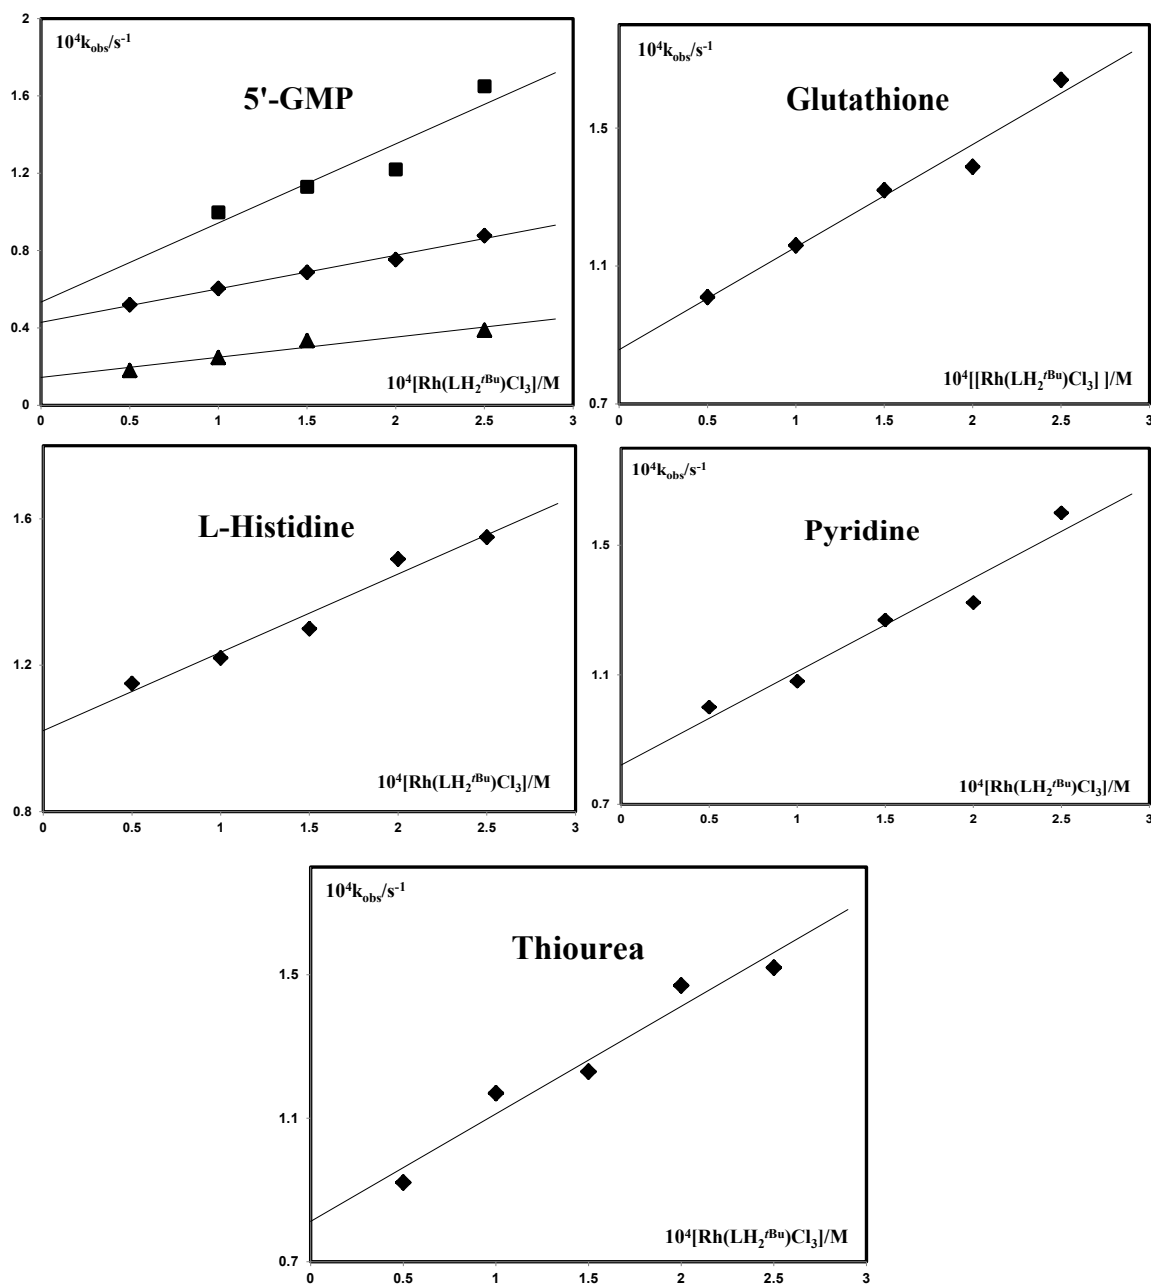

**Figure S2.** Pseudo-first order rate constants,  $k_{\text{obs}}$ , as a function of complex concentration and temperature for the substitution reactions between complex (1) and 5'-GMP (310, 298 and 288 K), GSH, Py and L-His at pH = 7.2 (25 mM HEPES buffer) in the presence of 50 mM NaCl at 310, 298 and 288 K.

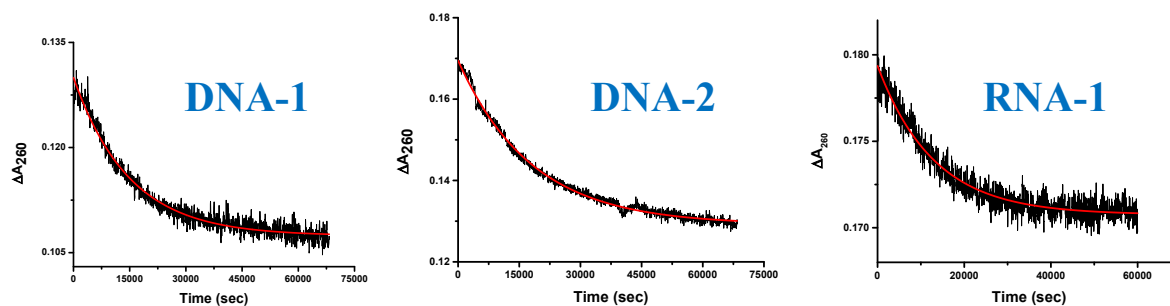

**Figure S3.** Absorbance change as a function of time after the addition of  $\text{Rh}^{\text{III}}$  complex to DNA-1, DNA-2 and RNA-1. All measurements were conducted with  $(\mathbf{1}) = 50.0 \mu\text{M}$ ,  $C_{\text{T}} = 3.0 \mu\text{M}$  and  $T = 37 \text{ }^{\circ}\text{C}$  in PBS buffered solution; Phosphate buffer solution = 0.01 M,  $C_{\text{NaCl}} = 0.137$ ,  $C_{\text{KCl}} = 0.0027 \text{ M}$ , pH 7.4). Fits of a single-exponential function to the experimental data are indicated with a solid line (red).

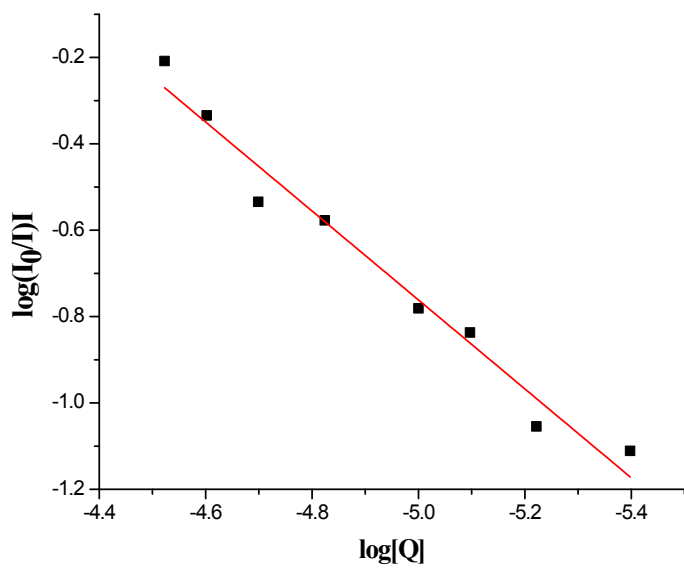

**Figure S4.** The linear plot shows  $\log[(I_0/I)/I]$  vs.  $\log[Q]$  for the interaction between (1) complex and CT-DNA;  $Q = (1)$

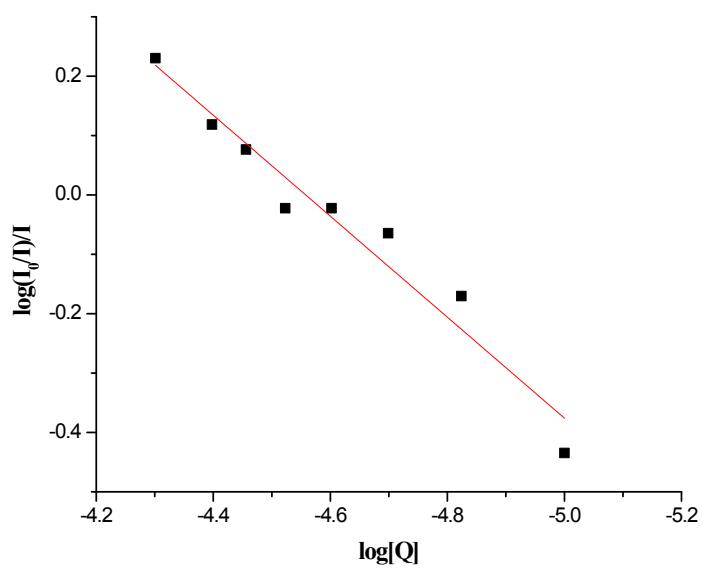

**Figure S5.** The linear plot shows  $\log[(I_o/I)/I]$  vs.  $\log[Q]$  for the interaction between (**1**) complex and BSA;  $Q = (\mathbf{1})$ .

**Table S1.** Hydrogen bond parameters for  $[\text{Rh}^{\text{III}}(\text{H}_2\text{L}^{\text{tBu}})\text{Cl}_3]$  complex ( $\text{\AA}$ ,  $^\circ$ )

| <i>D-H...A</i>             | <i>D-H</i> | <i>H...A</i> | <i>D...A</i> | <i>D-H...A</i> |
|----------------------------|------------|--------------|--------------|----------------|
| O1W-H1W...Cl1 <sup>1</sup> | 0.89(4)    | 2.35(4)      | 3.153(4)     | 151(4)         |
| O1W-H2W...Cl2 <sup>2</sup> | 0.88(4)    | 2.43(4)      | 3.215(3)     | 149(4)         |
| N3-H3...O1W <sup>3</sup>   | 0.95(3)    | 1.76(3)      | 2.712(4)     | 177(3)         |

Symmetry codes: **1**: -x,1-y,-z; **2**: -x,y,1/2-z; **3**: x,1-y,-1/2+z

**Table S2.** Observed *pseudo*-first order rate constants as a function of complex concentration and temperature for the reaction between complex (**1**) and L-Met at pH = 7.2 (25 mM Hepes buffer) in the presence of 50 mM NaCl at 310, 298 and 288 K.

| T(K)  | $10^4 C_{(1)}/M$ | $10^4 k_{\text{obsd}}/s^{-1}$ |
|-------|------------------|-------------------------------|
| 288.0 | 2.5              | 0.54(3) <sup>a</sup>          |
|       | 2.0              | 0.51(3)                       |
|       | 1.5              | 0.40(3)                       |
|       | 1.0              | 0.32(3)                       |
|       | 0.5              | 0.22(3)                       |
| 298.0 | 2.5              | 0.82(2)                       |
|       | 2.0              | 0.70(3)                       |
|       | 1.5              | 0.60(3)                       |
|       | 1.0              | 0.51(3)                       |
|       | 0.5              | 0.48(3)                       |
| 310.0 | 2.5              | 1.10(4)                       |
|       | 2.0              | 0.98(3)                       |
|       | 1.5              | 0.84(3)                       |
|       | 1.0              | 0.73(3)                       |
|       | 0.5              | 0.64(4)                       |

<sup>a</sup>Number of runs in parenthesis

**Table S3.** Observed *pseudo*-first order rate constants as a function of complex concentration and temperature for the reaction between complex (**1**) and 5'-GMP at pH = 7.2 (25 mM Hepes buffer) in the presence of 50 mM NaCl at 310, 298 and 288 K.

| T(K)  | $10^4 C_{(1)}/M$ | $10^4 k_{\text{obsd}}/s^{-1}$ |
|-------|------------------|-------------------------------|
| 288.0 | 2.5              | 0.39(3)                       |
|       | 2.0              | /                             |
|       | 1.5              | 0.33(3)                       |
|       | 1.0              | 0.25(3)                       |
|       | 0.5              | 0.18(3)                       |
| 298.0 | 2.5              | 0.88(2)                       |
|       | 2.0              | 0.75(3)                       |
|       | 1.5              | 0.69(3)                       |
|       | 1.0              | 0.60(3)                       |
|       | 0.5              | 0.52(3)                       |
| 310.0 | 2.5              | 1.65(4)                       |
|       | 2.0              | 1.22(3)                       |
|       | 1.5              | 1.13(3)                       |
|       | 1.0              | 1.00(3)                       |
|       | 0.5              | /                             |



**Table S4.** Observed *pseudo*-first order rate constants as a function of complex concentration and temperature for the reaction between complex (1) and GSH at pH = 7.2 (25 mM Hepes buffer) in the presence of 50 mM NaCl at 310, 298 and 288 K.

| T(K)  | $10^4 C_{(1)}/M$ | $10^4 k_{\text{obsd}}/s^{-1}$ |
|-------|------------------|-------------------------------|
| 310.0 | 2.5              | 1.64(3)                       |
|       | 2.0              | 1.39(3)                       |
|       | 1.5              | 1.32(3)                       |
|       | 1.0              | 1.16(3)                       |
|       | 0.5              | 1.01(3)                       |

**Table S5.** Observed *pseudo*-first order rate constants as a function of complex concentration and temperature for the reaction between complex (1) and L-His at pH = 7.2 (25 mM Hepes buffer) in the presence of 50 mM NaCl at 310, 298 and 288 K.

| T(K)  | $10^4 C_{(1)}/M$ | $10^4 k_{\text{obsd}}/s^{-1}$ |
|-------|------------------|-------------------------------|
| 310.0 | 2.5              | 1.55(3)                       |

|     |         |
|-----|---------|
| 2.0 | 1.49(3) |
| 1.5 | 1.30(3) |
| 1.0 | 1.22(3) |
| 0.5 | 1.15(3) |

**Table S6.** Observed *pseudo*-first order rate constants as a function of complex concentration for the reaction between (1) and DNA-1 in PBS buffer.

| T(K)  | $10^5 C_{(1)}/M$ | $10^5 k_{\text{obsd}}/s^{-1}$ |
|-------|------------------|-------------------------------|
| 310.0 | 0.5              | 1.88(3) <sup>a</sup>          |
|       | 1.5              | 3.24(3)                       |
|       | 3.0              | 5.81(3)                       |
|       | 5.0              | 6.73(3)                       |

<sup>a</sup>Number of runs in parenthesis

**Table S7.** Observed *pseudo*-first order rate constants as a function of complex concentration for the reaction between (1) and DNA-2 in PBS buffer.

| T(K) | $10^5 C_{(1)}/M$ | $10^5 k_{\text{obsd}}/s^{-1}$ |
|------|------------------|-------------------------------|
| 310  | 0.5              | 2.36(3)                       |
|      | 1.5              | 4.32(3)                       |

|     |         |
|-----|---------|
| 3.0 | 5.42(3) |
| 5.0 | 6.55(3) |

**Table S8.** Observed *pseudo*-first order rate constants as a function of complex concentration for the reaction between (1) and DNA-3 in PBS buffer.

| T(K) | $10^5 C_{(1)}/M$ | $10^5 k_{\text{obsd}}/s^{-1}$ |
|------|------------------|-------------------------------|
| 310  | 0.5              | 1.83(3)                       |
|      | 1.5              | 2.77(3)                       |
|      | 3.0              | 3.05(3)                       |
|      | 5.0              | 3.92(3)                       |

**Table S9.** Observed *pseudo*-first order rate constants as a function of complex concentration for the reaction between (1) and RNA-1 in PBS buffer.

| T(K) | $10^5 C_{(1)}/M$ | $10^5 k_{\text{obsd}}/s^{-1}$ |
|------|------------------|-------------------------------|
| 310  | 0.5              | 2.21(3)                       |
|      | 1.5              | 3.87(3)                       |
|      | 3.0              | 7.72(3)                       |
|      | 5.0              | 9.52(3)                       |
